# Supplementary material for: In vitro progesterone production by luteinized human mural granulosa cells is modulated by activation of AMPK and cause of infertility
Source: Reprod Biol Endocrinol. 2017 Sep 22;15:76. doi: 10.1186/s12958-017-0295-9 (PMC5610539; doi:10.1186/s12958-017-0295-9)
Supplement: Additional file 1: — Progestereone data from experiments 1 and 2. (XLSX 16 kb) [file 12958_2017_295_MOESM1_ESM.xlsx]

## Sheet: Experiment 1
Treament	Progesterone		Treament	Progesterone
Control	0.47		AICAR 0.075	0.398333
Control	3.77667		AICAR 0.075	0.664
Control	0.393333		AICAR 0.75	0.506
Control	3.54		AICAR 0.75	0.428
Control	0.28		AICAR 0.75	1.025
Control	0.923333		AICAR 7.5	0.243333
Control	0.69		AICAR 7.5	0.87
Control	1.01667		AICAR 7.5	0.433333
Control	0.603333		AICAR 7.5	0.33
Control	1.60667		AICAR 7.5	0.326667
Control	0.303333		AICAR 75	0.843333
Control	0.413333		AICAR 75	1.39333
DM 109 μm/L	1.05333		AICAR 75	0.446667
DM 109 μm/L	0.263333		AICAR 75	0.486667
DM 109 μm/L	0.826667		AICAR 75	0.426667
DM 109 μm/L	0.433333		Control	3.93667
DM 109 μm/L	2.87333		Control	1.54333
DM 109 μm/L	0.306667		Control	0.476667
DM 10.9 μm/L	3.18		Control	0.685
DM 10.9 μm/L	0.186667		Control	1.38
DM 10.9 μm/L	0.223333
DM 10.9 μm/L	3.18333
DM 10.9 μm/L	1.04
DM 10.9 μm/L	0.26
DM 1.09 μm/L	1.58
DM 1.09 μm/L	0.543333
DM 1.09 μm/L	2.22667
DM 1.09 μm/L	0.573333
DM 1.09 μm/L	0.456667
DM 0.109 μm/L	0.526667
DM 0.109 μm/L	2.88667
DM 0.109 μm/L	0.216667
DM 0.109 μm/L	0.933333
DM 0.109 μm/L	0.966
DM 0.109 μm/L	0.75
DM 0.109 μm/L	0.283333

## Sheet: Experiment 2
Patient	Age	BMI	Infertilty	Control	PGF	hCG	PGF + hCG	Gravidity	Total Gonadotropins	Stimulation Days	Day 3 FSH	E2 at Trigger	P4 at Trigger	Total Oocyte Retrieved	MII Ocytes Retrieved	Fertilization (%)	Division (%)	Pregnancy Outcome
2	35	31.1731	tubal	0.34	4.51	2.05	3.85	5	675	10	NT	1840	1.39	7	7	100	100	.
3	31	21.4539	male	0.68	.	2.6	.	0	2150	12	NT	2608	2.35	14	10	75	67	1
4	38	22.3117	unexplained	0.32	0.27	0.76	1.33	1	4200	10	13	1297	2.46	7	6	100	100	1
5	30	18.8794	unexplained	2.8	3.87	3.94	4.72	2	625	9	NT	3118	0.972	23	18	95	94	0
6	28	20.939	endometriosis	0.6	0.68	0.98	0.98	0	450	7	7	1022	1.46	2	2	100	100	1
7	36	21.1417	male	1.61	3.16	2.82	1.8	0	455	8	6	860	1.01	3	2	0	0	.
8	35	22.8603	endometriosis	0.3	1.16	0.56	0.56	1	2025	10	6	2151	2.54	8	7	57	100	0
10	32	21.4539	male	0.41	0.6	1.03	0.49	1	900	7	5	1455	1.42	7	5	100	100	1
11	33	27.1691	tubal	3.54	6.36	2.56	1.59	9	1237	9	6	1254	0.425	10	8	75	80	1
12	36	23.0432	tubal	1.02	2.23	2.33	2.55	8	1725	10	7	1063	0.618	7	7	100	100	1
13	33	23.4011	unexplained	0.46	.	2	.	0	1800	8	10	364	0.312	2	2	50	100	1
15	29	29.1772	male	0.92	2.18	3.17	3.38	0	750	9	7	2875	0.908	13	10	50	80	.
16	34	23.6253	endometriosis	0.69	1.62	1.35	1.99	0	1650	11	6	1479	0.889	6	5	100	100	0
17	33	28.3191	tubal	0.47	0.95	1.33	0.74	0	1210	11	9	1002	0.58	7	5	100	100	1
18	27	25.8599	tubal	3.78	2.61	1.45	1.23	1	1200	9	8	865	0.715	5	5	80	100	1
23	35	21.0315	endometriosis	0.75	0.86	1.27	2.65	1	2100	8	6	1562	1.26	8	6	83	100	1
25	30	20.5957	tubal	0.39	0.1	0.15	0.17	0	1095	9	NT	2872	0.658	10	7	71	100	0
26	37	28.6624	tubal	2.14	2.24	4.35	4.72	4	1900	8	4	1682	0.726	10	7	100	85.7	0
27	38	25.9693	male	0.24	0.27	2.82	2.79	0	1875	10	9	2289	0.956	10	8	100	87.5	1
29	31	35.5184	tubal	0.31	0.49	0.48	0.48	1	1125	9	5	432	0.356	3	1	100	100	0
30	25	23.026	tubal	0.79	1.88	5.02	0.79	2	1125	10	NT	3669	1.17	11	6	83.3	100	1
31	39	44.2599	tubal	0.86	1.24	1.19	0.62	0	3825	8	NT	865	2.63	4	4	50	100	0
32	32	22.6717	endometriosis	5.42	6.4	7	5	0	2050	9	10	1744	1.3	9	4	100	100	1
33	32	22.312	tubal	0.37	0.42	0.4	0.62	0	2200	9	8	2028	0.951	17	15	100	100	0
34	37	20.9005	endometriosis	3.67	1.82	.	.	0	1575	9	7	1796	0.794	6	4	100	100	.
35	32	23.026	tubal	1.58	1.99	3.86	5.23	1	2025	10	NT	1448	0.505	9	9	77.8	100	.
